# Supplementary material for: Development of a prediction model for exercise tolerance decline in the exercise assessment of patients with acute myocardial infarction undergoing percutaneous coronary intervention revascularization in the acute phase
Source: PubMed Central journal article supplement — J Thorac Dis. 2023 Aug 10;15(8):4486–96. doi: 10.21037/jtd-23-554 (PMC10482639; doi:10.21037/jtd-23-554), 2023-08-10
Supplement: jtd-15-08-4486-dss.pdf [file jtd-15-08-4486-dss.pdf]

## Data Sharing Statement

|                     |                                                                                                                                                     |                                                            |
|---------------------|-----------------------------------------------------------------------------------------------------------------------------------------------------|------------------------------------------------------------|
| <b>Article Info</b> | <a href="https://dx.doi.org/10.21037/jtd-23-554">https://dx.doi.org/10.21037/jtd-23-554</a>                                                         |                                                            |
| <b>Item</b>         | <b>Question</b>                                                                                                                                     | <b>Authors' Response<br/>(place "-" if not applicable)</b> |
| 1                   | Would you like to share data collected for your study to others?                                                                                    | Yes.                                                       |
| 2                   | If not, would you like to share the reason for your decision?                                                                                       | -                                                          |
| 3                   | What data in particular will be shared?                                                                                                             | All related data.                                          |
| 4                   | Any other documents will be shared? Such as study protocol, statistical analysis plan, informed consent form, clinical study report, analytic code. | Study protocol, statistical analysis plan could be shared. |
| 5                   | When will data availability begin?                                                                                                                  | From the publication.                                      |
| 6                   | When will data availability end?                                                                                                                    | Two years after publication.                               |
| 7                   | To whom will you share the data?                                                                                                                    | All doctors.                                               |
| 8                   | For what type of analysis or purpose?                                                                                                               | Research and clinic purpose.                               |
| 9                   | How or where can the data/documents be obtained?                                                                                                    | From contacting the corresponding authors.                 |
| 10                  | Any other restrictions?                                                                                                                             | No.                                                        |
